# Supplementary material for: Synthesis and controlled crystallization of in situ prepared poly(butylene-2,6-naphthalate) nanocomposites
Source: Royal Society of Chemistry journal article supplement (doi:10.1039/c8ce00260f), 2018-01-01
Supplement: c8ce00260f1.pdf [file c8ce00260f1.pdf]

## Synthesis and controlled crystallization of *in situ* prepared poly(butylene-2,6-naphthalate) nanocomposites

Dimitrios G. Papageorgiou<sup>1</sup>, Dimitrios N. Bikiaris<sup>2</sup>, George Z. Papageorgiou<sup>3\*</sup>

<sup>1</sup>*School of Materials and National Graphene Institute, University of Manchester, Oxford Road, Manchester M13 9PL, United Kingdom*

<sup>2</sup>*Laboratory of Polymer Chemistry and Technology, Department of Chemistry, Aristotle University of Thessaloniki, GR-541 24, Thessaloniki, Macedonia, Greece*

<sup>3</sup>*Chemistry Department, University of Ioannina, P.O. Box 1186, 45110 Ioannina, Greece*

### Supplementary Information

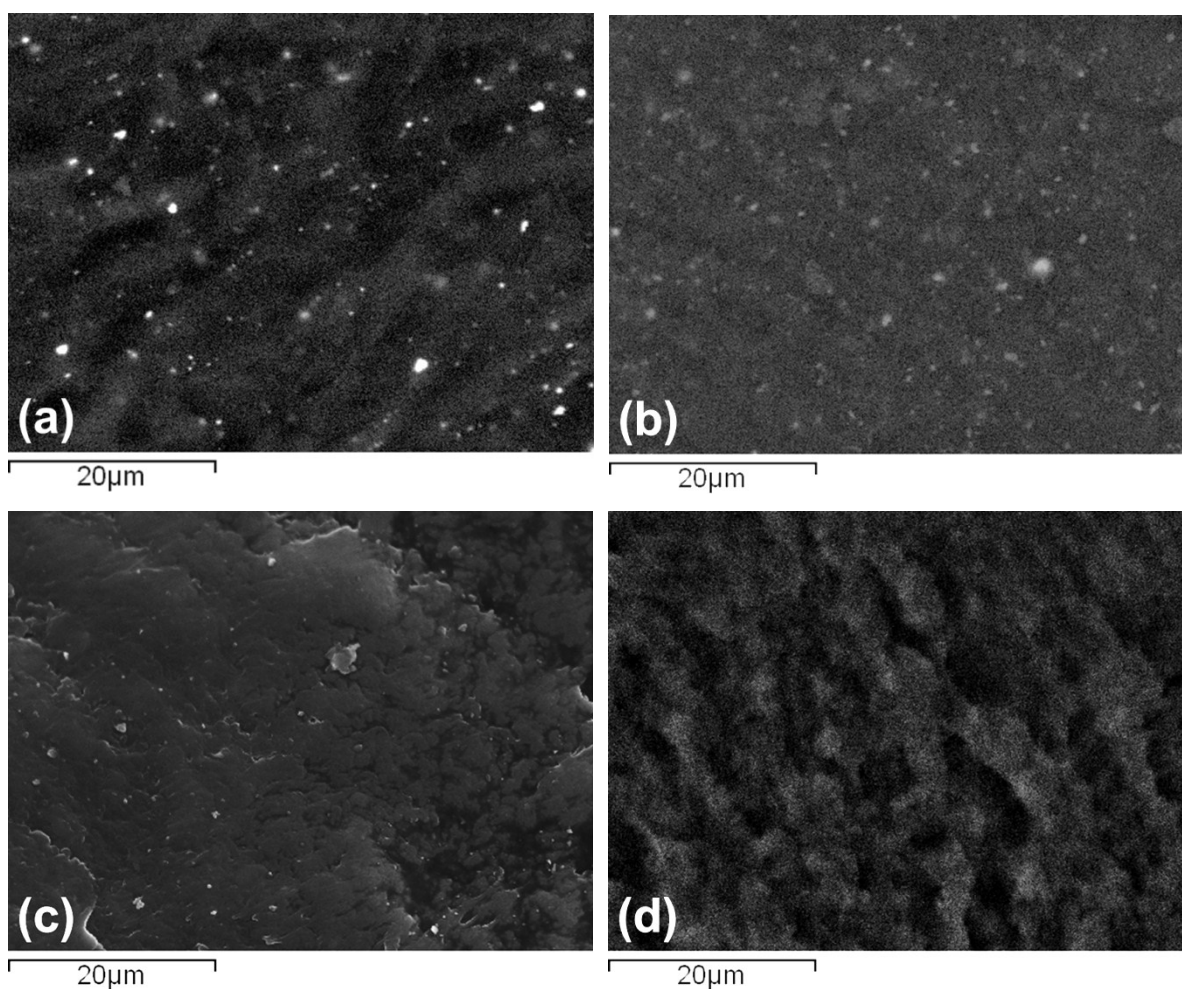

Figure S1. SEM images of (a) PBN/Silver, (b) PBN/Alumina, (c) PBN/Nanodiamonds, (d) PBN/Silica nanocomposites.

Table S1. Spherulite growth rates for all samples annealed at 220 °C at different times.

| Time (sec) | Spherulite Radius ( $\mu\text{m}$ ) |            |            |             |                  |
|------------|-------------------------------------|------------|------------|-------------|------------------|
|            | PBN                                 | PBN/Silica | PBN/Silver | PBN/Alumina | PBN/Nanodiamonds |
| 20         | 2.54                                | 2.48       | 2.5        | 2.49        | 2.46             |
| 45         | 5.88                                | 5.82       | 5.84       | 5.85        | 5.8              |
| 55         | 6.99                                | 6.94       | 6.95       | 6.96        | 6.91             |
| 69         | 8.63                                | 8.6        | 8.63       | 8.61        | 8.76             |
| 79         | 10.10                               | 9.97       | 10.04      | 10.06       | 10.03            |
| 95         | 11.88                               | 11.81      | 11.83      | 11.8        | 11.79            |
